# Supplementary material
Source: PubMed Central journal article supplement (PMC2928718)

Supplementary Figure 1.

rs17762150  
rs17762192  
rs1367951

36 kb,  $D' = 0.2-0.24$

PROX1  
NM\_002763

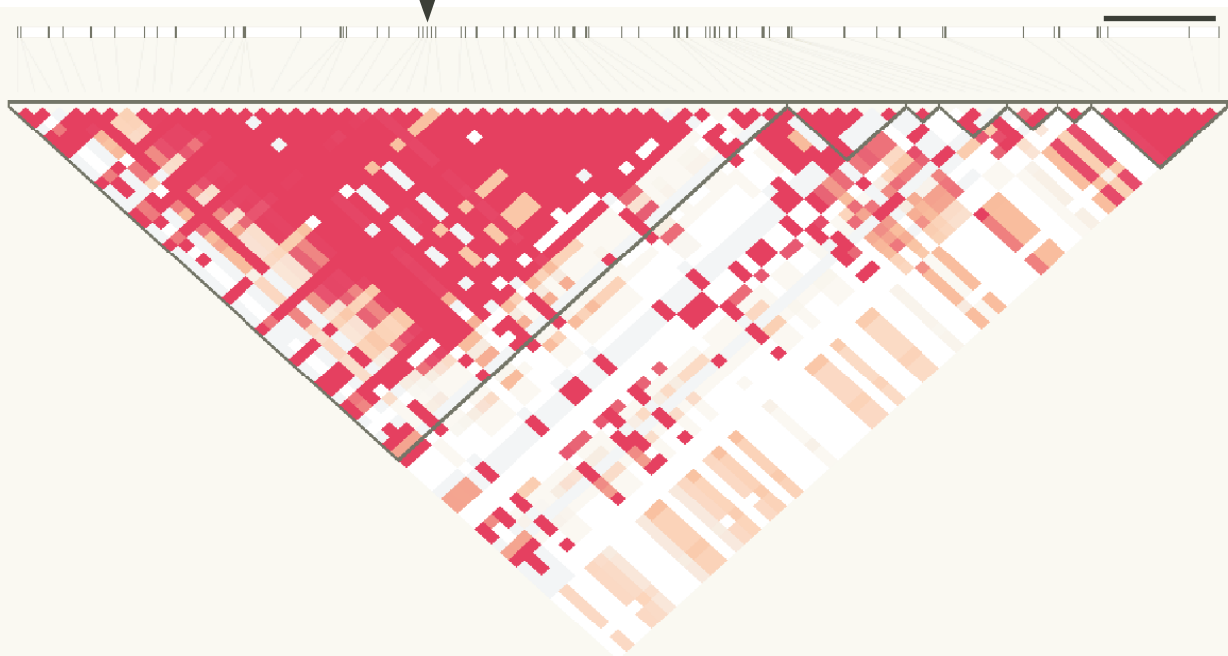

Supplement: NIHMS174410-supplement-Figure.pdf [file NIHMS174410-supplement-Figure.pdf]
